# Supplementary figures and images for: A standardized ultrasound approach in neuralgic amyotrophy
Source: PubMed Central journal article supplement — Muscle Nerve. 2022 Aug 30;67(1):3–11. doi: 10.1002/mus.27705 (PMC10087170; doi:10.1002/mus.27705), 2022-08-30

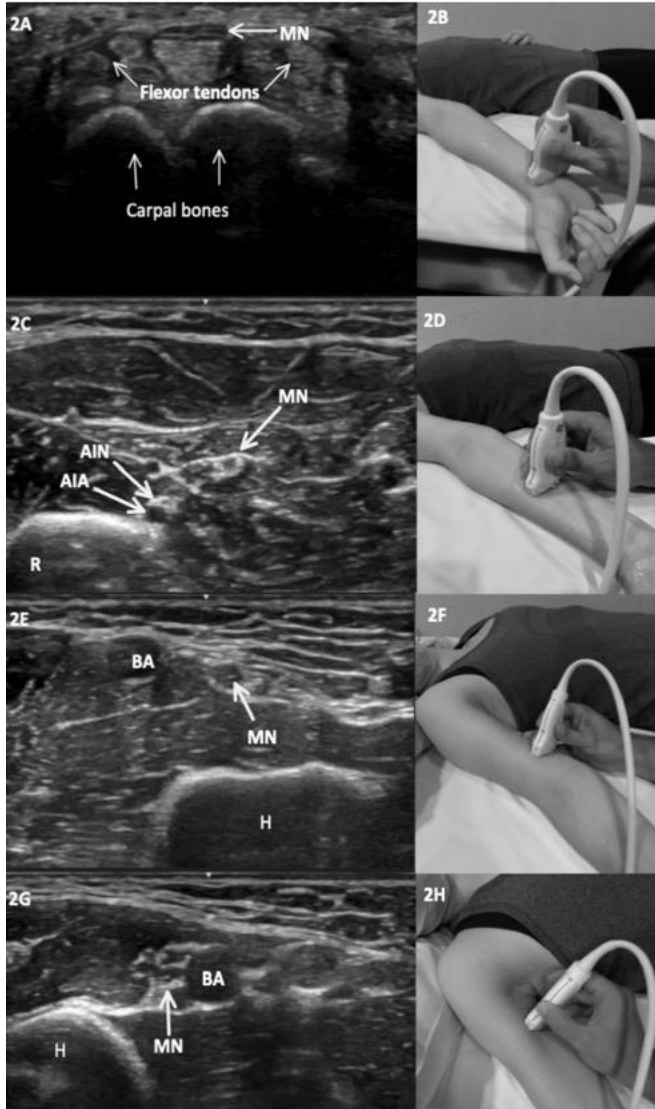

21

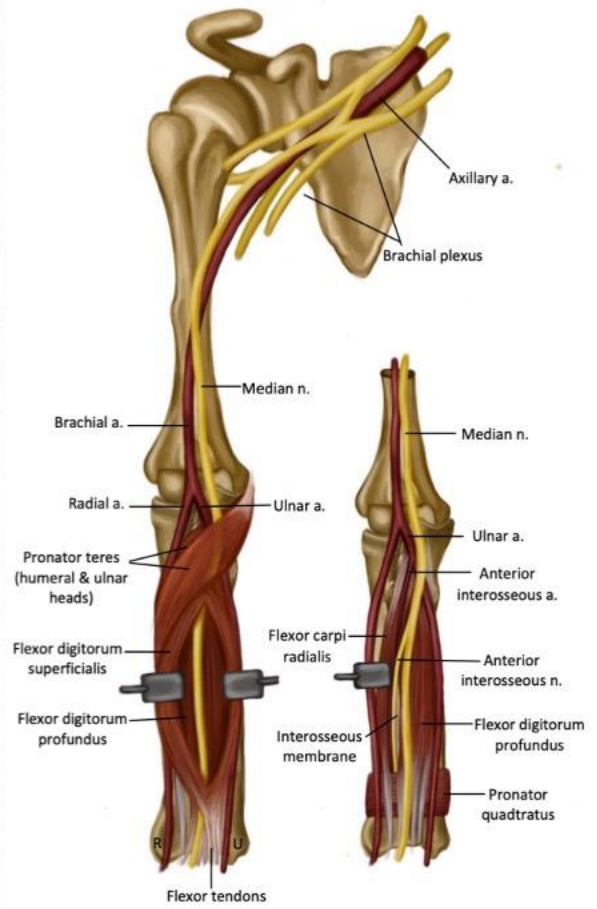

Supplement: MUS-67-3-s002.pdf [file MUS-67-3-s002.pdf]

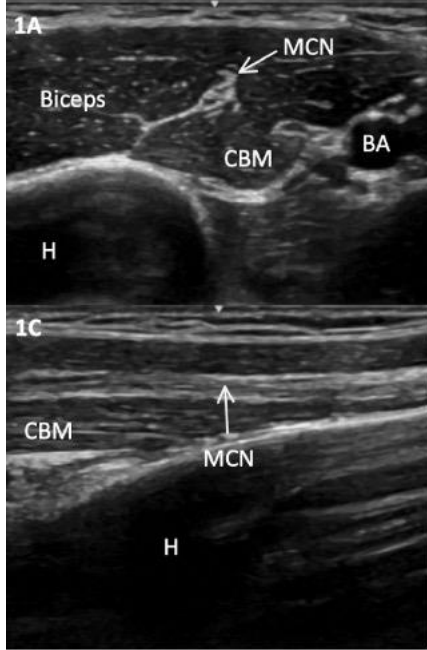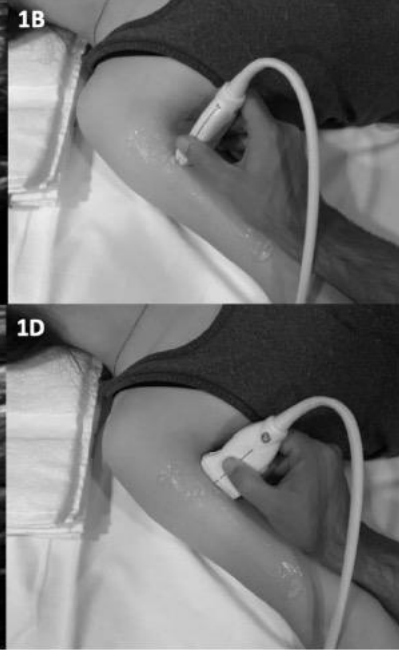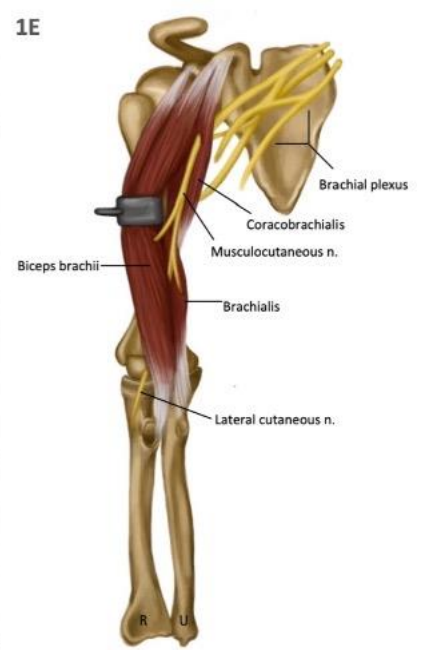

Supplement: MUS-67-3-s003.pdf [file MUS-67-3-s003.pdf]

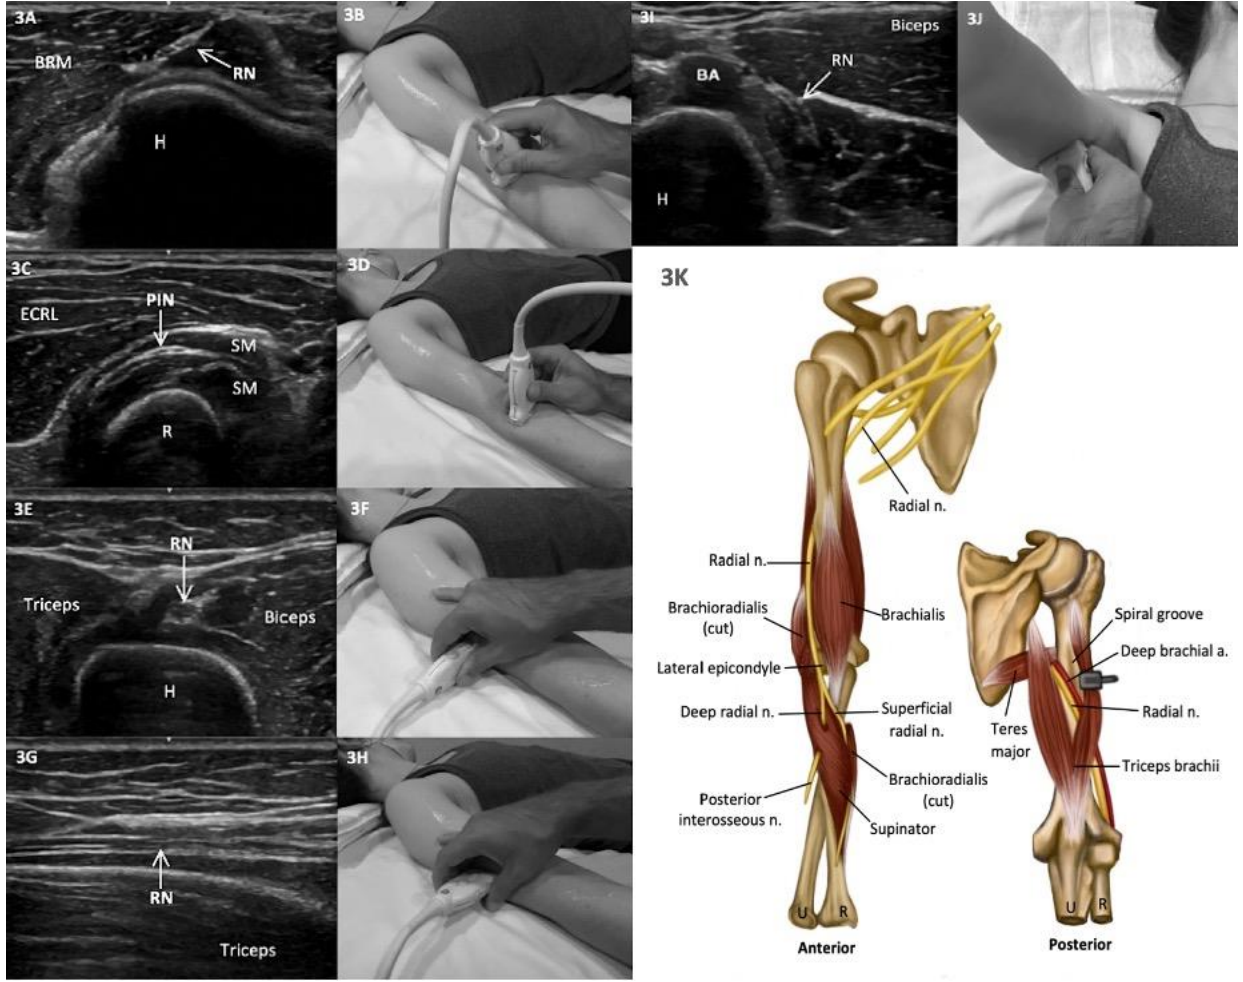

Supplement: MUS-67-3-s004.pdf [file MUS-67-3-s004.pdf]
